# Supplementary material for: Maternal Obesity and Risk of Sudden Unexpected Infant Death
Source: PubMed Central journal article supplement — JAMA Pediatr. 2024 Jul 29;178(9):906–13. doi: 10.1001/jamapediatrics.2024.2455 (PMC11287443; doi:10.1001/jamapediatrics.2024.2455), 2024-07-29
Supplement: jamapediatr-e242455-s001.pdf [file jamapediatr-e242455-s001.pdf]

## Data Sharing Statement

Tanner. Maternal Obesity and Risk of Sudden Unexpected Infant Death. *JAMA Pediatr.*  
Published July 29, 2024. doi:10.1001/jamapediatrics.2024.2455

### Data

**Data available:** Yes

**Data types:** Deidentified participant data, Data dictionary

**How to access data:** [https://www.cdc.gov/nchs/data\\_access/vitalstatsonline.htm](https://www.cdc.gov/nchs/data_access/vitalstatsonline.htm)

**When available:** With publication

### Supporting Documents

**Document types:** None

### Additional Information

**Who can access the data:** Anyone. The data are freely downloadable.

**Types of analyses:** Any.

**Mechanisms of data availability:** The data are freely downloadable from the CDC NCHS Vital Statistics Online Data Portal.
